# Supplementary material
Source: ML conference proceedings conference paper supplement (https://aclanthology.org/D11-1013)
Supplement: Attachment [file D11-1013.Attachment.zip]

# Appendix for “Domain-Assisted Product Aspect Hierarchy Generation: Towards Hierarchical Organization of Unstructured Consumer Reviews”

Jianxing Yu<sup>1</sup>, Zheng-Jun Zha<sup>1</sup>, Meng Wang<sup>1</sup>, Kai Wang<sup>2</sup>, Tat-Seng Chua<sup>1</sup>

<sup>1</sup>School of Computing, National University of Singapore

<sup>2</sup>Institute for Infocomm Research, Singapore

{jianxing, zhazj, wangm, chuats}@comp.nus.edu.sg    kwang@i2r.a-star.edu.sg

## 1 Appendix A

### 1.1 6 patterns in Hearst1992

- 1)  $NP_Y (,)?$  such as  $NP_X$
- 2) such  $NP_Y$  as  $NP_X$  and/or  $NP_X$
- 3)  $NP_X (,)?$  or other  $NP_Y$
- 4)  $NP_X (,)?$  and other  $NP_Y$
- 5)  $NP_Y (,)?$  including and/or  $NP_X$
- 6)  $NP_Y (,)?$  especially and/or  $NP_X$

### 1.2 30 phrase-level patterns in Girju2006

- 1)  $NP_X PP_Y$ 
  - $PP_Y$  starts with *of*
- 2)  $NP_X PP_Y$ 
  - $PP_Y$  starts with *in*
- 3)  $NP_X PP_Y$ 
  - $NP_X$  ends with *branch*
  - $PP_Y$  begins with *of*
- 4)  $NP_X PP_Y$  -  $PP_Y$  starts with *from*
- 5)  $NP_X PP_Y$ 
  - $PP_Y$  starts with *throughout*
- 6)  $NP_X PP_Y$ 
  - $PP_Y$  starts with *at*
- 7)  $NP_X PP_Y$ 
  - $PP_Y$  starts with *on*
- 8)  $NP_X PP_Y$ 
  - $PP_Y$  starts with *to*
- 9)  $NP_X PP_Y$ 
  - $PP_Y$  starts with *around*
- 10)  $NP_X PP_Y$ 
  - $PP_Y$  starts with *all over*
- 11) X and other Z of Y
- 12)  $NP_X PP_Y$ 
  - $PP_Y$  starts with *to*

- $NP_X$  ends with *damage*
- 13)  $NP_X PP_Y$ 
  - $PP_Y$  starts with *onto*
- 14)  $NP_X PP_Y$ 
  - $PP_Y$  starts with *outside*
- 15)  $NP_Y PP_X$ 
  - $PP_X$  starts with *with*
- 16)  $NP_Y PP_X$ 
  - $PP_X$  starts with *above*
- 17)  $NP_Y s NP_X$
- 18)  $PP_X PP_Y$ 
  - $PP_X$  starts with *in*
  - $PP_Y$  starts with *in*
- 19)  $PP_Y PP_X$ 
  - $PP_X$  starts with *on*
  - $PP_Y$  starts with *on*
- 20)  $NP_X, NP_Y$
- 21)  $PP_Y WHP_X$ 
  - $WHP_X$  starts with *whose*
- 22)  $NP_{X1X2} PP_Y$ 
  - $NP_{X1X2}$  ends with *branches*
  - $NP_{X1X2}$  contains *and* or *or*
  - $PP_Y$  begins with *of*
- 23)  $NP_{X1X2} PP_Y$ 
  - $NP_{X1X2}$  contains *and* or *or*
  - $PP_Y$  begins with *of*
- 24)  $NP_Y (NP_{X1X2})$ 
  - $NP_{X1X2}$  contains *and* or *or*
- 25)  $NP_X (NP_Y )$
- 26)  $NP_Y NP_X$
- 27)  $NP_Z CNP_X NP_Y$
- 28)  $NP_Y NP_X NP_Z$
- 29)  $NP_X NP_Y$
- 30)  $NP_X CNP_Y NP_Z$

### 1.3 10 sentence-level patterns in Girju2006

#### 1) NP<sub>Y</sub> verb NP<sub>X</sub>

- verbs: *carry, combine, comprehend, comprise, consist, contain, enclose, feature, have, hold, hold in, house, include, incorporate, inherit, integrate, receive, retain, subsume*

#### 2) NP<sub>Z</sub> verb NP<sub>X</sub> PP<sub>Y</sub>

- PP<sub>Y</sub> starts with *in, into, as or from*

- verbs: *assemble, build, build in, carry, combine, compose, compound, comprehend, comprise, connect, consist, construct, contain, coordinate, create, embrace, enclose, enter, fabricate, feature, file, form, have, hold, hold in, house, include, incorporate, infix, inherit, insert, integrate, introduce, join, link, make, manufacture, merge, observe, organize, overlap, receive, retain, subsume, unify, unite, use*

#### 3) NP<sub>Z</sub> verb PP<sub>X</sub> PP<sub>Y</sub>

- PP<sub>Y</sub> starts with *through*

- verbs: *drag, exit, leave*

#### 4) NP<sub>X</sub> verb NP<sub>Y</sub>

- verbs: *accommodate, add, admit, affiliate, appertain, be, bear, belong, build in, colligate, compose, compound, confine, constitute, dwell, embrace, encompass, fall in, form, get together, infiltrate, inhere, involve, join, let in, lie, lie in, make, make up, pertain, rejoin, repose, represent, reside, rest, sign up, take*

#### 5) NP<sub>X</sub> verb PP<sub>Y</sub>

- verbs: *attached to, inhere in* (PP<sub>Y</sub> starts with *in* or *to*)

#### 6) NP<sub>X</sub> verb NP<sub>Z</sub> PP<sub>Y</sub>

- PP<sub>Y</sub> starts with *of*

- NP<sub>Z</sub> is *part* or *member*

#### 7) NP<sub>X</sub> NP<sub>Y</sub> verb

- verbs: *carry, combine, comprehend, comprise, consist, contain, enclose, feature, have, hold, hold in, house, include, incorporate, inherit, integrate, receive, retain, subsume*

#### 8) NP<sub>Y1</sub> verb NP<sub>X</sub> to NP<sub>Y2</sub>

- verbs: *donate, give*

#### 9) In PP<sub>Y</sub>, NP<sub>X1</sub> verb NP<sub>X2</sub>

- verbs: *cover*

in NP<sub>Y</sub> packed to NP<sub>X</sub>

#### 10) NP<sub>Z</sub> PP<sub>X</sub> verb NP<sub>T</sub> PP<sub>Y</sub>

CPP<sub>X</sub> starts with *in*

CNP<sub>T</sub> contains an adjective superlative

- verb: *be*

## 2 Appendix B

WordNet 12 topics: gathering, professional, people, building, place, milk, meal, water, beverage, alcohol, dish, and herb.

ODP 16 topics: computers, robotics, intranet, mobile computing, database, operating system, linux, tex, software, computer science, data communication, algorithms, data formats, security multimedia, and artificial intelligence.
